# Supplementary material
Source: PubMed Central journal article supplement (PMC6012250)
Supplement: dey086suppl_table1.pdf [file dey086suppl_table1.pdf]

**Supplemental Table S1 Association between physical activity and incidence of anovulatory cycles; EAGeR Study, 2006–2012 (N = 1128).**

|                                               | Unadjusted RR     | Adjusted RR       |
|-----------------------------------------------|-------------------|-------------------|
| Vigorous activity (bouts of $\geq 10$ min)    |                   |                   |
| Hours per week (continuous)                   | 1.02 (0.98, 1.05) | 1.01 (0.98, 1.05) |
| None                                          | Referent          | Referent          |
| >0 to $\leq 1$ h/wk                           | 1.03 (0.73, 1.46) | 1.07 (0.77, 1.48) |
| >1 to $\leq 2$ h/wk                           | 1.09 (0.80, 1.47) | 1.06 (0.78, 1.44) |
| >2 to $\leq 3$ h/wk                           | 1.61 (1.20, 2.17) | 1.54 (1.16, 2.04) |
| >3 to $\leq 4$ h/wk                           | 1.13 (0.73, 1.77) | 1.28 (0.82, 1.98) |
| >4 h/wk                                       | 1.05 (0.72, 1.54) | 1.07 (0.74, 1.55) |
| Moderate activity (bouts of $\geq 10$ min)    |                   |                   |
| Hours per week (continuous)                   | 0.99 (0.98, 1.01) | 1.00 (0.98, 1.01) |
| None                                          | Referent          | Referent          |
| >0 to $\leq 1$ h/wk                           | 1.03 (0.75, 1.4)  | 1.00 (0.73, 1.37) |
| >1 to $\leq 2$ h/wk                           | 0.74 (0.51, 1.06) | 0.78 (0.55, 1.12) |
| >2 to $\leq 3$ h/wk                           | 0.72 (0.48, 1.08) | 0.70 (0.47, 1.03) |
| >3 to $\leq 4$ h/wk                           | 1.20 (0.77, 1.87) | 1.17 (0.74, 1.86) |
| >4 h/wk                                       | 0.88 (0.67, 1.16) | 0.90 (0.70, 1.17) |
| Walking (bouts of $\geq 10$ min)              |                   |                   |
| Hours per week (continuous)                   | 0.99 (0.98, 1.01) | 1.00 (0.98, 1.01) |
| None                                          | Referent          | Referent          |
| Some vs none, BMI < 25 kg/m <sup>2</sup>      | 0.99 (0.56, 1.76) | 1.01 (0.55, 1.86) |
| Some vs none, BMI $\geq 25$ kg/m <sup>2</sup> | 1.00 (0.71, 1.41) | 0.99 (0.70, 1.38) |
| Sitting                                       |                   |                   |
| Hours per day (continuous)                    | 1.00 (0.97, 1.03) | 0.99 (0.96, 1.01) |

Notes: Estimates are from log-binomial regression using general estimating equations to derive risk ratios for anovulation; adjusted model includes parity, marital status and BMI, except for BMI stratified walking analyses.
